# Supplementary material for: Erythrocyte membrane based cationic polymer-mcDNA complexes as an efficient gene delivery system
Source: Royal Society of Chemistry journal article supplement (doi:10.1039/c6bm00638h), 2016-11-28
Supplement: c6bm00638h1.pdf [file c6bm00638h1.pdf]

## Electronic Supplementary information

### **Erythrocyte membrane based cationic polymer-mcDNA complexes as an efficient gene delivery system**

Ping Huang<sup>†, a</sup>, Jing Zhao<sup>†, a</sup>, Chi-ju Wei<sup>c</sup>, Xiao-hu Hou<sup>a</sup>, Ping-zhang Chen<sup>a</sup>, Yan Tan<sup>b</sup>,  
Cheng-yi He<sup>a</sup>, Zhi-yong Wang<sup>\*, a, b</sup>, Zhi-ying Chen<sup>\*, a</sup>

<sup>a</sup> Center for Gene and Cell Engineering, Institute of Biomedicine and Biotechnology,  
Shenzhen Institutes of Advanced Technology, Chinese Academy of Sciences,  
Shenzhen 518055, P. R. China.

<sup>b</sup> Paul C. Lauterbur Research Center for Biomedical Imaging, Shenzhen Key  
Laboratory for MRI, Institute of Biomedical and Health Engineering, Shenzhen  
Institutes of Advanced Technology, Chinese Academy of Sciences, Shenzhen 518055,  
P. R. China.

<sup>c</sup> Multidisciplinary Research Center, Shantou 515063, P. R. China.

<sup>†</sup> Equal to contributions.

\*Corresponding author.

E-mail: zy.wang@siat.ac.cn, zy.chen1@siat.ac.cn

## **Part of experimental details:**

### **The optimization for hypotonic solution formula**

Five kinds of hypotonic solution as the following formulas:

Solution 1 (Sol.1): 2.5 mM Tris, 0.025 mM EDTA, 0.25 mM CaCl<sub>2</sub>.

Solution 2 (Sol.2): 5 mM Tris, 0.05 mM EDTA, 0.5 mM CaCl<sub>2</sub>.

Solution 3 (Sol.3): 10 mM Tris, 0.1 mM EDTA, 1 mM CaCl<sub>2</sub>.

Solution 4 (Sol.4): 20 mM Tris, 0.2 mM EDTA, 2 mM CaCl<sub>2</sub>.

Solution 5 (Sol.5): 40 mM Tris, 0.4 mM EDTA, 4 mM CaCl<sub>2</sub>.

Erythrocyte membrane was prepared with the same processes described in the manuscript. Intact membrane system structure is crucial for cargoes delivery. In order to evaluate the integrity property of the prepared membrane system, all the samples were stained by trypan blue and measured via flow cytometry (BD FACS Canto™ II, USA).

Herein, the integrity ratio was calculated according to the following formula:

$$\text{Integrity ratio (\%)} = (\text{uncoloured cells} / \text{total cells}) \times 100\%$$

As shown in Fig. S1, the FSC/SSC signal from erythrocyte membrane which prepared in Sol.1 and Sol.2 solutions were different with the natural erythrocyte. It indicated that the low osmotic pressure caused erythrocyte membrane disruption. By contrast, there were more than 90% samples maintained membrane integrality in Sol.3, Sol.4 and Sol.5 solutions. Meanwhile, these samples exhibited the similar SSC and FSC signal intensity. However, there were still several erythrocytes through the preparation via Sol.4 and Sol.5 solutions which were observed under an optical microscope (not shown here). Therefore, the hemoglobin could be nearly totally eliminated and the high membrane integrity could be prepared within Sol.3 hypotonic solution. Finally, the Sol.3 was selected as the optimized hypotonic solution formula for the following experiments in this paper.

## **The transfection efficiency of EM-XtremeGENE-mcDNA prepared with different hypotonic solution formula**

We prepared four kinds of hypotonic solution as the following formulas.

Formulation 1 (EM1): 10 mM Tris, 0.1 mM EDTA, 1 mM CaCl<sub>2</sub>.

Formulation2 (EM2): 5mM NaH<sub>2</sub>PO<sub>4</sub>, 5mM NaH<sub>2</sub>PO<sub>4</sub>·H<sub>2</sub>O, 5mM, Na<sub>2</sub>HPO<sub>4</sub>·7H<sub>2</sub>O, 5mM MgCl<sub>2</sub>.

Formulation 3 (EM3): 1mM KH<sub>2</sub>PO<sub>4</sub>, 5mM Na<sub>2</sub>HPO<sub>4</sub>, 27.4mM NaCl, 0.54mM KCl.

Formulation 4 (EM4): 0.2mM KH<sub>2</sub>PO<sub>4</sub>, 1mM Na<sub>2</sub>HPO<sub>4</sub>, 5.5mM NaCl, 0.1mM KCl.

Erythrocyte membrane was prepared with the same processes described in the manuscript. The transfection efficiency of EM-XtremeGENE-mcDNA was evaluated. 293T cell was selected as the targeted cell and the XtremeGENE HP DNA Transfection Reagent was applied to form cationic complexes. Cells were seeded at the density of  $1.0 \times 10^4$  cells in 96-well plates with complete FBS containing media and were incubated at 37 °C for 24 h. Then, the media was removed and 100 μL FBS free DMEM solution contained EM-cationic polymer-mcDNA system (0.5 μg mcDNA per well) was added. The cells were incubated for 4 h and the samples containing media was replaced with fresh FBS containing media. After 24, 48, 72, 96 and 168 h, the EGFP expression was observed using an inverted fluorescence microscope. Then flow cytometry (BD FACS Canto™ II, USA) was performed to measure the gene transfection efficiency. In all experiments, XtremeGENE/mcDNA complexes were used as controls. Free erythrocyte membrane was used as the negative control.

The transfection results (Fig.S2) show that the EM-XtremeGENE-mcDNA (EM1) resulted the highest transfection efficiency. Thus the formulation 1 (10 mM Tris, 0.1 mM EDTA, 1 mM CaCl<sub>2</sub>) was selected for the subsequent experiment.

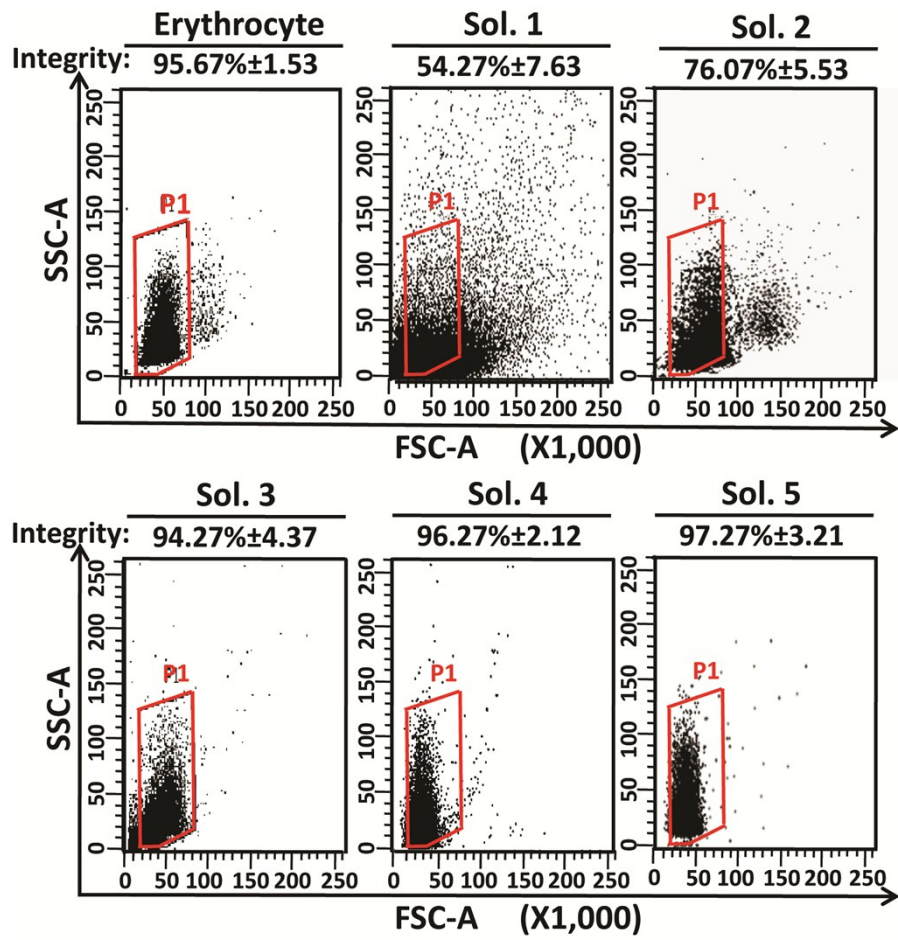

**Fig. S1.** The calculated integrity ratio and FSC-SSC signals of erythrocyte membrane prepared with different kinds of hypotonic solution.

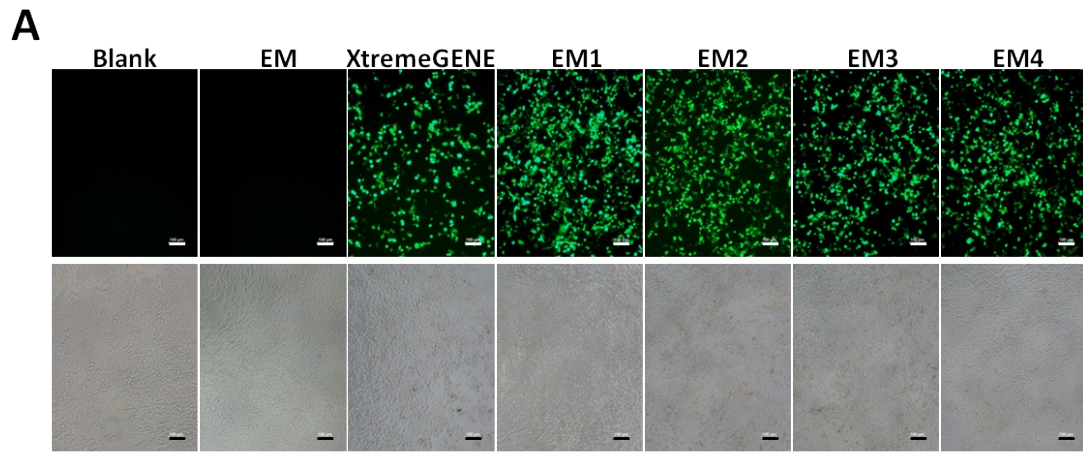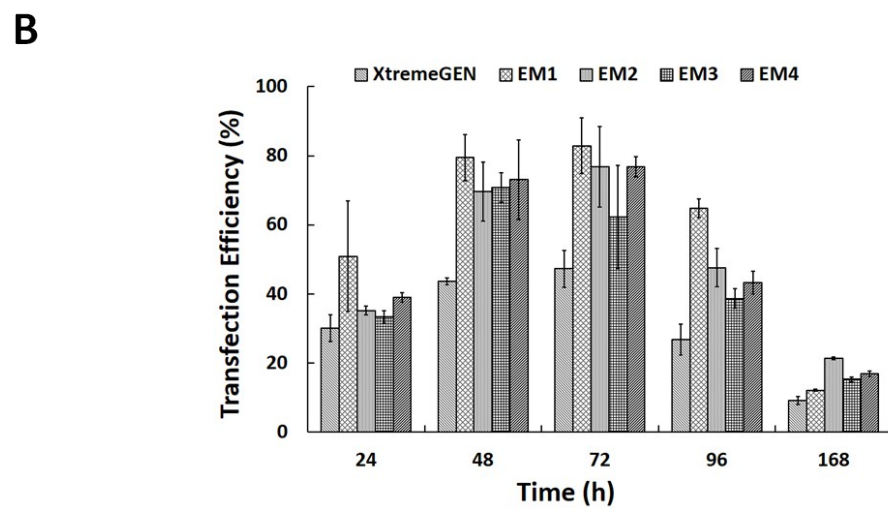

**Fig. S2.** (A) Fluorescent microscope images of EGFP expression at 48 h, Scale bar 100  $\mu$ m. (B) Transfection efficiency of different samples.
